# Supplementary material for: Hemiaminal dynamic covalent networks with rapid stress relaxation, reprocessability and degradability endowed by the synergy of disulfide and hemiaminal bonds
Source: Royal Society of Chemistry journal article supplement (doi:10.1039/d3ra05413f), 2023-01-01
Supplement: d3ra05413f1.pdf [file d3ra05413f1.pdf]

## Electronic supplementary information

# Hemiaminal Dynamic Covalent Networks with Rapid Stress Relaxation, Reprocessability and Degradability Endowed by the Synergy of Disulfide and Hemiaminal Bonds

Siyao Zhu,<sup>†a,b</sup> Yan Wang,<sup>†c</sup> Jiaxin Qin,<sup>a,b</sup> Li Chen,<sup>a,b</sup> Liying Zhang,<sup>a</sup> Yi Wei<sup>\*a</sup>,  
Wanshuang Liu<sup>\*a</sup>

<sup>a</sup>Shanghai High Performance Fibers and Composites Center (Province-Ministry Joint),  
Shanghai Key Laboratory of Lightweight Composite, Center for Civil Aviation  
Composites, Donghua University, 2999 North Renmin Road, Shanghai.

<sup>b</sup>Key Laboratory of Textile Science & Technology, Ministry of Education, College of  
Textiles, Donghua University, 2999 North Renmin Road, Shanghai, 201620, China.

<sup>c</sup>College of Materials Science & Engineering, Donghua University, 2999 North  
Renmin Road, Shanghai, 201620, China.

<sup>†</sup>Siyao Zhu and Yan Wang contributed equally to this work and should be considered  
as joint-first authors.

\* Corresponding author's E-mail: Yi Wei, Email: weiy@dhu.edu.cn; Wanshuang Liu,  
Email: wslu@dhu.edu.cn.

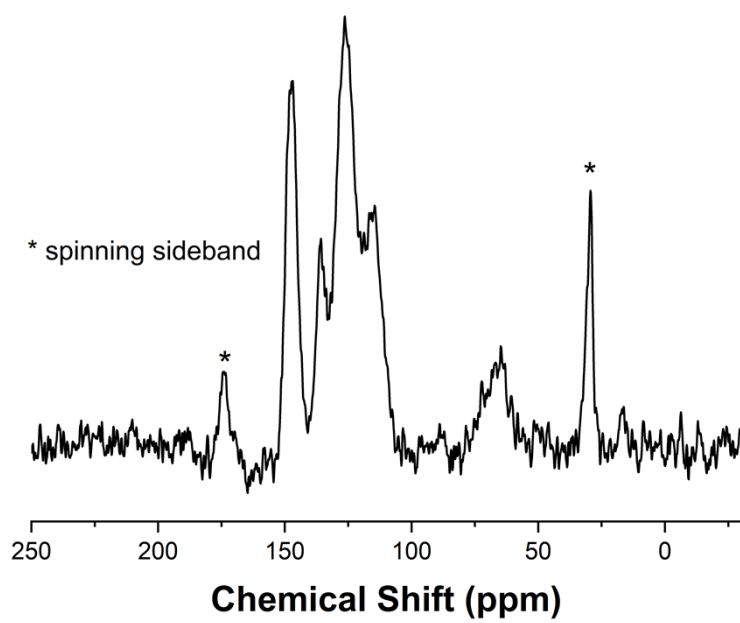

**Fig. S1** Solid state  $^{13}\text{C}$  NMR spectrum of HDCN-DTDA.

**Table S1** A comparison of reprocessing temperatures, reprocessing times and degradation conditions between HDCNs-DTDA and reported vitrimers containing single disulfide or hemiaminal bonds

| Polymer type | Dynamic bond                   | Reprocessing temperature (°C) | Reprocessing time (min) | Degraded condition                            | Ref.      |
|--------------|--------------------------------|-------------------------------|-------------------------|-----------------------------------------------|-----------|
| HDCNs        | Hemiaminal bond                | 140                           | 30                      | Amine solution                                | 1         |
| HDCNs        | Hemiaminal bond                | -                             | -                       | Sulfuric acid solution                        | 2         |
| HDCNs        | Hemiaminal bond                | -                             | -                       | Sulfuric acid solution                        | 3         |
| HDCNs        | Hemiaminal bond                | -                             | -                       | Hydrochloric acid solution                    | 4         |
| Epoxy resin  | Disulfide bond                 | 155                           | 120                     | Tributylphosphine solvent                     | 5         |
| Epoxy resin  | Disulfide bond                 | 180                           | 60                      | Thiol solution                                | 6         |
| HDCNs        | Hemiaminal and disulfide bonds | 130                           | 10                      | Thiol solution and hydrochloric acid solution | This work |

## References

1. H. Lei, S. Wang, D. J. Liaw, Y. Cheng, X. Yang, J. Tan, X. Chen, J. Gu and Y. Zhang, *ACS Macro Letters*, 2019, **8**, 582-587.
2. J. M. García, G. O. Jones, K. Virwani, B. D. McCloskey, D. J. Boday, G. M. ter Huurne, H. W. Horn, D. J. Coady, A. M. Bintaleb, A. M. S. Alabdulrahman, F. Alsewailem, H. A. A. Almegren and J. L. Hedrick, *Science*, 2014, **344**, 732-735.
3. Z. Li, J. Qiu and C. Pei, *Cellulose*, 2016, **23**, 2449-2455.
4. Z. Xing, X. Jia, X. Li, J. Yang, S. Wang, Y. Li, D. Shao, L. Feng and H. Song, *ACS Applied Materials & Interfaces*, 2023, **15**, 11053-11061.
5. X. Qi, J. Zhang, L. Zhang and D. Yue, *Journal of Materials Chemistry A*, 2021, DOI: 10.1039/D1TA06299A.
6. H. Si, L. Zhou, Y. Wu, L. Song, M. Kang, X. Zhao and M. Chen, *Composites Part B: Engineering*, 2020, **199**, 108278.
